# Supplementary material for: Comparing the Effects of Low-Protein and High-Carbohydrate Diets and Caloric Restriction on Brain Aging in Mice
Source: PubMed Central journal article supplement — Cell Rep. Author manuscript; Available in PMC 2018 Dec 17. (PMC6296764; doi:10.1016/j.celrep.2018.10.070), 2018-11-20
Supplement: NIHMS1515789-supplement-1.pdf [file NIHMS1515789-supplement-1.pdf]

**Supplemental Information**

**Comparing the Effects of Low-Protein  
and High-Carbohydrate Diets  
and Caloric Restriction on Brain Aging in Mice**

**Devin Wahl, Samantha M. Solon-Biet, Qiao-Ping Wang, Jibrán A. Wali, Tamara Pulpitel, Ximonie Clark, David Raubenheimer, Alistair M. Senior, David A. Sinclair, Gregory J. Cooney, Rafael de Cabo, Victoria C. Cogger, Stephen J. Simpson, and David G. Le Couteur**

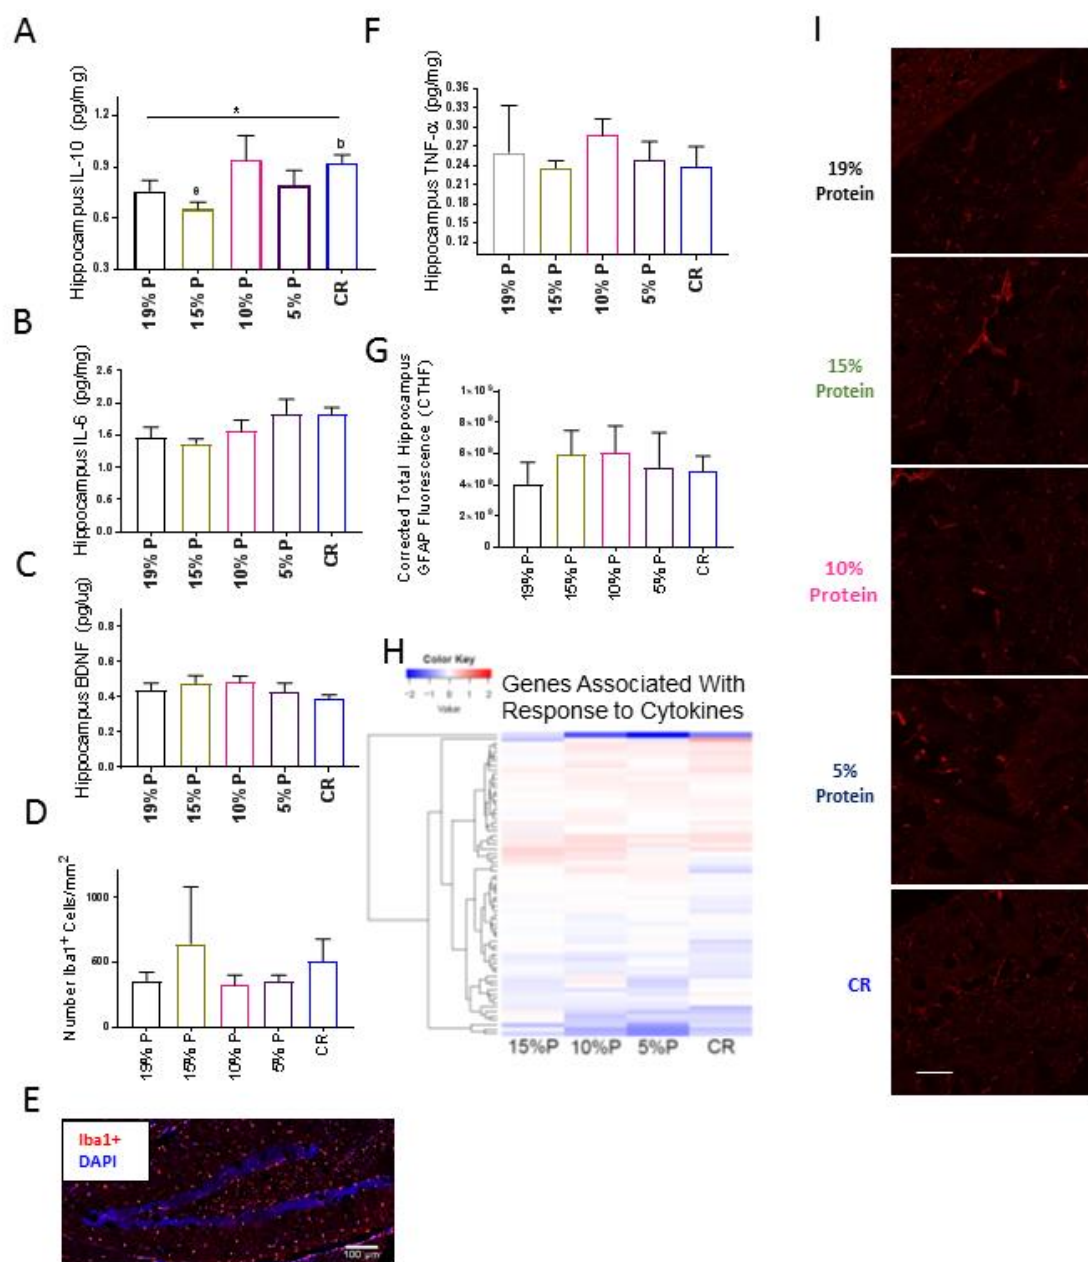

**Figure S1.** Hippocampal changes in markers of inflammation and associated gene changes in response to CR of LPHC diets, Related to Figure 1.

(A) IL-10 concentrations as measured by ELISA. n=8 biological replicates (4 male, 4 female) per experimental group, 15 months of age. \* $p < 0.05$ , \*\* $p < 0.01$ , \*\*\* $p < 0.001$ , \*\*\*\* $p < 0.0001$  Kruskal-Wallis ANOVA. a = significantly different to 19% P; b= significantly different to 15% P; c=significantly different to 10% P; d=significantly different to 5% P; e=significantly different to CR as determined by a Dunn's post-hoc analysis.

(B) IL-6 concentrations as measured by ELISA. n=8 biological replicates (4 male, 4 female) per experimental group, 15 months of age.

- (C) BDNF concentrations as measured by ELISA. n=8 biological replicates (4 male, 4 female) per experimental group, 15 months of age.
- (D) Number of Iba1<sup>+</sup> cells per mm<sup>2</sup> of hippocampus and representative image, 15 months of age, n=3-7 biological replicates per experimental group. All data are represented by the mean  $\pm$ SEM of the biological replicates.
- (E) Representative image of Iba1 immunofluorescence staining. Scale bar=100  $\mu$ m.
- (F) TNF- $\alpha$  concentrations as measured by ELISA. n=8 biological replicates (4 male, 4 female) per experimental group, 15 months of age.
- (G) Corrected total hippocampus GFAP immunofluorescence in the hippocampus, 15 months of age, 3 – 6 biological replicates per experimental group. All data are represented by the mean  $\pm$ SEM of the biological replicates. Scale bar = 100  $\mu$ m.
- (H) Heatmap of significantly upregulated or downregulated genes involved to some degree in response to cytokines as revealed by the AmiGO gene ontology online database. Each experimental group is compared to 19% P, and the degree of relatedness among the genes is shown on the y-axis. n=6 biological replicates per experimental group. See also Table S9.
- (I) Representative images of GFAP immunofluorescence staining in the hippocampus of each group. Scale bar = 100  $\mu$ m.

**A**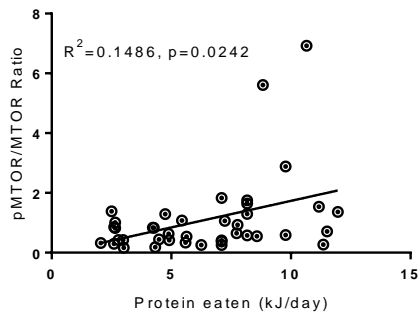**B**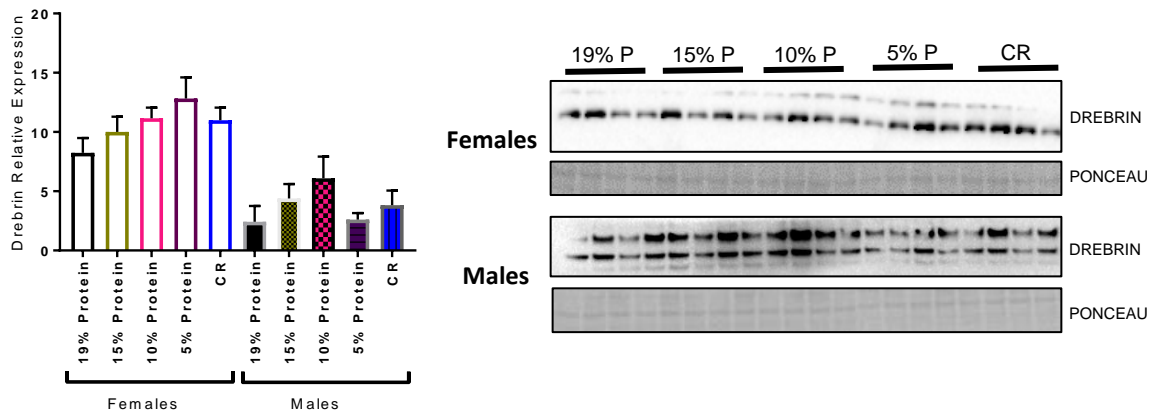

**Figure S2.** (A) Correlation of average protein intake measured from 12 – 15 months of age and p-mTOR/mTOR as measured by immunoblotting. 15 months of age, 14 months on diet,  $n=40$  (B) Drebrin protein expression as measured by immunoblotting,  $n=4$  mice per experimental group, Related to Figures 2 and 3.

**Table S1.** Systemic and cardiometabolic measurements related to mouse health and the differences among the groups as determined by ANOVA, Related to Figure 1.

|                                   | <b>19% Protein F</b> | <b>15% Protein F</b> | <b>10% Protein F</b> | <b>5% Protein F</b> | <b>CR F</b> |        |
|-----------------------------------|----------------------|----------------------|----------------------|---------------------|-------------|--------|
| Number of values                  | 12                   | 12                   | 11                   | 12                  | 12          |        |
| <b>Urea (mmol/L)</b>              | 8.13                 | 5.99                 | 4.51                 | 3.12                | 5.9         | ****   |
| Std. Error of Mean                | 0.52                 | 0.37                 | 0.13                 | 0.19                | 0.29        |        |
|                                   | <b>19% Protein M</b> | <b>15% Protein M</b> | <b>10% Protein M</b> | <b>5% Protein M</b> | <b>CR M</b> |        |
| Number of values                  | 12                   | 12                   | 12                   | 12                  | 12          |        |
| <b>Urea (mmol/L)</b>              | 7.31                 | 5.64                 | 5.43                 | 3.02                | 5.88        | ****   |
| Std. Error of Mean                | 0.5                  | 0.33                 | 0.29                 | 0.16                | 0.27        |        |
|                                   | <b>19% Protein F</b> | <b>15% Protein F</b> | <b>10% Protein F</b> | <b>5% Protein F</b> | <b>CR F</b> |        |
| Number of values                  | 12                   | 11                   | 10                   | 11                  | 11          |        |
| <b>Albumin (g/L)</b>              | 31.67                | 24.91                | 27.7                 | 25.45               | 26.64       | p=0.07 |
| Std. Error of Mean                | 0.86                 | 1.95                 | 2.1                  | 2.57                | 1.33        |        |
|                                   | <b>19% Protein M</b> | <b>15% Protein M</b> | <b>10% Protein M</b> | <b>5% Protein M</b> | <b>CR M</b> |        |
| Number of values                  | 12                   | 10                   | 12                   | 12                  | 12          |        |
| <b>Albumin (g/L)</b>              | 30.25                | 24.9                 | 30.42                | 27.08               | 25.17       | p=0.06 |
| Std. Error of Mean                | 0.89                 | 3.31                 | 1.19                 | 1.35                | 1.49        |        |
|                                   | <b>19% Protein F</b> | <b>15% Protein F</b> | <b>10% Protein F</b> | <b>5% Protein F</b> | <b>CR F</b> |        |
| Number of values                  | 11                   | 11                   | 9                    | 11                  | 11          |        |
| <b>Alanine Transaminase (U/L)</b> | 60.45                | 59.18                | 77.44                | 31.91               | 31.27       | **     |
| Std. Error of Mean                | 12.34                | 9.375                | 10.55                | 8.201               | 3.063       |        |

|                                                              | <b>19% Protein M</b> | <b>15% Protein M</b> | <b>10% Protein M</b> | <b>5% Protein M</b> | <b>CR M</b> |            |
|--------------------------------------------------------------|----------------------|----------------------|----------------------|---------------------|-------------|------------|
| Number of values                                             | 12                   | 10                   | 12                   | 12                  | 12          |            |
| <b>Alanine Transaminase (U/L)</b>                            | 109.6                | 100                  | 78.33                | 61.67               | 48.08       | <b>n.s</b> |
| Std. Error of Mean                                           | 20.71                | 26.43                | 11.68                | 35.16               | 18.18       |            |
|                                                              |                      |                      |                      |                     |             |            |
|                                                              | <b>19% Protein F</b> | <b>15% Protein F</b> | <b>10% Protein F</b> | <b>5% Protein F</b> | <b>CR F</b> |            |
| Number of values                                             | 8                    | 8                    | 8                    | 8                   | 8           |            |
| <b>RQ (CO<sub>2</sub> eliminated/O<sub>2</sub> consumed)</b> | 0.85                 | 0.86                 | 0.85                 | 0.88                | 0.85        | <b>n.s</b> |
| Std. Error of Mean                                           | 0.03                 | 0.02                 | 0.02                 | 0.02                | 0.02        |            |
|                                                              | <b>19% Protein M</b> | <b>15% Protein M</b> | <b>10% Protein M</b> | <b>5% Protein M</b> | <b>CR M</b> |            |
| Number of values                                             | 8                    | 8                    | 8                    | 8                   | 8           |            |
| <b>RQ (CO<sub>2</sub> eliminated/O<sub>2</sub> consumed)</b> | 0.86                 | 0.78                 | 0.86                 | 0.87                | 0.88        | <b>n.s</b> |
| Std. Error of Mean                                           | 0.03                 | 0.07                 | 0.03                 | 0.02                | 0.01        |            |

**Table S2.** The top 10 differentially regulated genes when comparing each group to 19% protein as determined by whole-hippocampus RNA sequencing, Related to Figure 2.

| <b>CR</b>     | <b>log2Fold</b> | <b>padj</b> | <b>5% protein</b> | <b>log2Fold</b> | <b>padj</b> | <b>10% protein</b> | <b>log2Fold</b> | <b>padj</b> | <b>15% protein</b> | <b>log2Fold</b> | <b>padj</b> |
|---------------|-----------------|-------------|-------------------|-----------------|-------------|--------------------|-----------------|-------------|--------------------|-----------------|-------------|
| <i>Pcmd1</i>  | -0.3            | 9.63E-08    | <i>Gpr17</i>      | 0.45            | 0.0001624   | <i>Gpr17</i>       | 0.55            | 1.35E-07    | <i>Gpr17</i>       | 0.59            | 4.70E-09    |
| <i>Ogt</i>    | -0.22           | 5.91E-06    | <i>Banp</i>       | 0.35110019      | 0.07741306  | <i>Dpysl5</i>      | 0.6             | 0.000512442 | <i>Hspa5</i>       | 0.43            | 5.43E-05    |
| <i>Mgea5</i>  | -0.23           | 6.65E-06    | <i>Hps4</i>       | 0.33538882      | 0.07741306  | <i>Celf6</i>       | 0.48            | 0.000512442 | <i>Zkscan2</i>     | -0.48           | 5.43E-05    |
| <i>Dbp</i>    | 0.66            | 1.41E-05    | <i>Tbkbp1</i>     | 0.27080488      | 0.07741306  | <i>Gabrb2</i>      | -0.36           | 0.000512442 | <i>Hif3a</i>       | 1.5             | 7.52E-05    |
| <i>Krit1</i>  | -0.28           | 1.41E-05    | <i>C1qb</i>       | 0.25910273      | 0.07741306  | <i>Hif3a</i>       | 1.37            | 0.000558493 | <i>Hyou1</i>       | 0.27            | 0.00018658  |
| <i>Nr2f6</i>  | 0.58            | 4.94E-05    | <i>Adam15</i>     | 0.22450936      | 0.07741306  | <i>Sin3b</i>       | 0.27            | 0.000558493 | <i>Zfp46</i>       | -0.39           | 0.00018658  |
| <i>Zfp46</i>  | 0.37            | 5.15E-05    | <i>Bicd2</i>      | 0.20701693      | 0.07741306  | <i>Htra1</i>       | 0.27            | 0.000558493 | <i>Sdf2l1</i>      | 0.65            | 0.00027147  |
| <i>Dpp8</i>   | -0.19           | 5.15E-05    | <i>Nr1d2</i>      | -0.2183401      | 0.07741306  | <i>Adam15</i>      | 0.28            | 0.000645404 | <i>Zbtb16</i>      | 0.82            | 0.00032782  |
| <i>Dchs1</i>  | 0.47            | 6.31E-05    | <i>Ppm1k</i>      | -0.2571362      | 0.07741306  | <i>Pik3r3</i>      | -0.32           | 0.000645404 | <i>Xbp1</i>        | 0.36            | 0.00064116  |
| <i>Cited2</i> | 0.53            | 6.48E-05    | <i>Rab26</i>      | 0.33478248      | 0.08287597  | <i>Sema4b</i>      | 0.43            | 0.000708531 | <i>Plin4</i>       | 2.22            | 0.00067156  |

**Table S3.** The top 20 genes positively and negatively correlated with daily protein intake (kJ/day) averaged during 12 – 15 months of age, Related to Figure 2.

| <b>Positive Correlation</b> | <b>pearsonR</b> | <b>pearsonP</b> |
|-----------------------------|-----------------|-----------------|
| <b><i>Gabrb2</i></b>        | 0.784133581     | 5.79E-06        |
| <i>9330159M07Rik</i>        | 0.736824362     | 4.02E-05        |
| <i>Gm26782</i>              | 0.706759482     | 0.00011304      |
| <i>Tox</i>                  | 0.696467344     | 0.00015653      |
| <i>Wwp1</i>                 | 0.695299857     | 0.00016228      |
| <i>Nr3c1</i>                | 0.692538917     | 0.00017662      |
| <i>4930570G19Rik</i>        | 0.691203312     | 0.00018395      |
| <i>Kcnj2</i>                | 0.689924315     | 0.00019121      |
| <i>Rbms1</i>                | 0.689492841     | 0.00019372      |
| <i>Ackr2</i>                | 0.684763554     | 0.00022312      |
| <i>Rfc4</i>                 | 0.681916376     | 0.00024264      |
| <i>Klf7</i>                 | 0.675662426     | 0.00029079      |
| <i>1190002N15Rik</i>        | 0.670712936     | 0.00033458      |
| <i>Abca5</i>                | 0.670653265     | 0.00033514      |
| <i>Pou2f1</i>               | 0.66813019      | 0.00035963      |
| <i>Gm37893</i>              | 0.667798783     | 0.00036296      |
| <i>Ankrd45</i>              | 0.666294702     | 0.00037841      |
| <i>Gpr21</i>                | 0.66539544      | 0.00038791      |
| <i>Fgf22</i>                | 0.6609034       | 0.00043855      |
| <i>Adam22</i>               | 0.655440583     | 0.00050778      |
| <b>Negative Correlation</b> | <b>pearsonR</b> | <b>pearsonP</b> |
| <b><i>Zc3h13</i></b>        | -0.7260193      | 5.92E-05        |
| <i>Tnfsf9</i>               | -0.7213022      | 6.97E-05        |
| <i>Nkd2</i>                 | -0.7098425      | 0.00010227      |
| <i>Rasip1</i>               | -0.7000014      | 0.00014018      |
| <i>Sema4f</i>               | -0.691355       | 0.0001831       |
| <i>Scfd2</i>                | -0.6886966      | 0.00019842      |
| <i>Gm12397</i>              | -0.6885625      | 0.00019922      |
| <i>Bicd2</i>                | -0.6873154      | 0.00020681      |
| <i>Tubb2b</i>               | -0.6673107      | 0.00036791      |
| <i>Dchs1</i>                | -0.6662718      | 0.00037865      |
| <i>Sap30</i>                | -0.6600511      | 0.00044878      |
| <i>Chrd</i>                 | -0.6575432      | 0.00048009      |
| <i>AI846148</i>             | -0.6540868      | 0.00052632      |
| <i>Syt3</i>                 | -0.6501643      | 0.00058342      |
| <i>Tm6sf2</i>               | -0.6486166      | 0.00060737      |
| <i>AI429214</i>             | -0.647457       | 0.00062587      |
| <i>Sin3b</i>                | -0.6473848      | 0.00062704      |
| <i>H2afy</i>                | -0.6416336      | 0.00072632      |
| <i>Cys1</i>                 | -0.6414134      | 0.00073037      |
| <i>Pald1</i>                | -0.6399919      | 0.00075703      |



**Table S4.** All shared genes between CR and lower protein, higher carbohydrate intake groups, Related to Figure 2.

| <b>Shared gene upregulated with CR and overexpressed with lower protein intake (indicated by a negative Pearson correlation)</b> | <b>CR log2fold Change compared to 19% protein</b> | <b>padj</b> | <b>pearsonR</b> | <b>pearsonP</b> |
|----------------------------------------------------------------------------------------------------------------------------------|---------------------------------------------------|-------------|-----------------|-----------------|
| <i>sSema4b</i>                                                                                                                   | 0.35405266                                        | 0.00395479  | -0.4564001      | 0.02497717      |
| <i>Dll1</i>                                                                                                                      | 0.39680323                                        | 0.04350238  | -0.4584617      | 0.02424797      |
| <i>Comtd1</i>                                                                                                                    | 0.43191836                                        | 0.03282046  | -0.460656       | 0.02349074      |
| <i>Cpt1c</i>                                                                                                                     | 0.23754724                                        | 0.01157335  | -0.4608663      | 0.02341919      |
| <i>Gpc1</i>                                                                                                                      | 0.28894253                                        | 0.04392112  | -0.4672625      | 0.02132536      |
| <i>Csf1r</i>                                                                                                                     | 0.27288127                                        | 0.0434855   | -0.4713588      | 0.0200659       |
| <i>Caskin1</i>                                                                                                                   | 0.26486868                                        | 0.00202484  | -0.4716514      | 0.01997831      |
| <i>Gal3st3</i>                                                                                                                   | 0.3972901                                         | 0.00603562  | -0.4787775      | 0.01793871      |
| <i>Samd14</i>                                                                                                                    | 0.50928462                                        | 0.0079495   | -0.4797691      | 0.01766886      |
| <i>Nop56</i>                                                                                                                     | 0.19101881                                        | 0.01455354  | -0.4827977      | 0.01686502      |
| <i>Tspyl2</i>                                                                                                                    | 0.20810608                                        | 0.00687638  | -0.4839497      | 0.01656722      |
| <i>Trim11</i>                                                                                                                    | 0.22123632                                        | 0.04413688  | -0.4906383      | 0.01492168      |
| <i>Gm13375</i>                                                                                                                   | 0.64435866                                        | 0.00016257  | -0.4990689      | 0.01304064      |
| <i>Hspa2</i>                                                                                                                     | 0.4416678                                         | 0.00193604  | -0.499491       | 0.01295185      |
| <i>Tbkbp1</i>                                                                                                                    | 0.28845956                                        | 0.00181942  | -0.5070009      | 0.01145318      |
| <i>Gm7367</i>                                                                                                                    | 0.55333569                                        | 0.0271947   | -0.5116942      | 0.01059142      |
| <i>Irs2</i>                                                                                                                      | 0.39567919                                        | 0.0192398   | -0.5123711      | 0.01047167      |
| <i>Nup214</i>                                                                                                                    | 0.22864657                                        | 0.03726844  | -0.5149816      | 0.01002029      |
| <i>Foxo6</i>                                                                                                                     | 0.73404501                                        | 0.00828187  | -0.5246487      | 0.00848648      |
| <i>Ap2a2</i>                                                                                                                     | 0.25068819                                        | 0.00241388  | -0.5321432      | 0.00743631      |
| <i>Nr2f6</i>                                                                                                                     | 0.57619746                                        | 4.94E-05    | -0.5367311      | 0.00684858      |
| <i>Pcdh8</i>                                                                                                                     | 0.59059                                           | 0.01599156  | -0.5578539      | 0.00461804      |
| <i>Ebf4</i>                                                                                                                      | 0.34335844                                        | 0.01988292  | -0.5632839      | 0.00415579      |
| <i>Cpe</i>                                                                                                                       | 0.19651479                                        | 0.0028257   | -0.5673905      | 0.00383267      |
| <i>1700017B05Rik</i>                                                                                                             | 0.55912801                                        | 0.00017238  | -0.5676455      | 0.00381332      |
| <i>Dmwd</i>                                                                                                                      | 0.20250142                                        | 0.00301955  | -0.5689788      | 0.00371352      |
| <i>Icam5</i>                                                                                                                     | 0.35340368                                        | 0.01668618  | -0.5703367      | 0.00361414      |
| <i>Wscd1</i>                                                                                                                     | 0.29228139                                        | 0.00395479  | -0.57126        | 0.00354786      |
| <i>Fbxo21</i>                                                                                                                    | 0.22978884                                        | 0.00301955  | -0.5771505      | 0.00314871      |
| <i>2510039O18Rik</i>                                                                                                             | 0.29879598                                        | 0.00121498  | -0.5787825      | 0.0030451       |
| <i>Bcar1</i>                                                                                                                     | 0.18898261                                        | 0.0492433   | -0.5892797      | 0.00244525      |
| <i>Kcng2</i>                                                                                                                     | 0.68077627                                        | 0.02018061  | -0.5944876      | 0.00218705      |
| <i>Prkcsh</i>                                                                                                                    | 0.16888627                                        | 0.01603777  | -0.5965451      | 0.00209164      |
| <i>Prdm8</i>                                                                                                                     | 0.44193864                                        | 0.04848226  | -0.604109       | 0.00177072      |
| <i>Grasp</i>                                                                                                                     | 0.28017977                                        | 0.02323257  | -0.6107547      | 0.00152441      |
| <i>Aldoa</i>                                                                                                                     | 0.20282323                                        | 0.00208295  | -0.6107806      | 0.00152351      |

|                                                                                                                                                         |                                                               |             |                 |                 |
|---------------------------------------------------------------------------------------------------------------------------------------------------------|---------------------------------------------------------------|-------------|-----------------|-----------------|
| <i>Adam11</i>                                                                                                                                           | 0.25321804                                                    | 0.04350238  | -0.6317069      | 0.0009297       |
| <i>Sin3b</i>                                                                                                                                            | 0.18626064                                                    | 0.01860923  | -0.6473848      | 0.00062704      |
| <i>Syt3</i>                                                                                                                                             | 0.25567563                                                    | 0.00422911  | -0.6501643      | 0.00058342      |
| <i>Dchs1</i>                                                                                                                                            | 0.46948691                                                    | 6.31E-05    | -0.6662718      | 0.00037865      |
| <b>Shared gene<br/>downregulated in CR<br/>and under expressed<br/>with lower protein intake<br/>(indicated by a positive<br/>Pearson correlation).</b> | <b>CR log2fold<br/>Change<br/>compared to<br/>19% protein</b> | <b>padj</b> | <b>pearsonR</b> | <b>pearsonP</b> |
| <i>Gabrb2</i>                                                                                                                                           | -0.3508222                                                    | 0.00018875  | 0.78413358      | 0.00000579      |
| <i>Klf7</i>                                                                                                                                             | -0.2217289                                                    | 0.03548333  | 0.67566243      | 0.00029079      |
| <i>Ankrd45</i>                                                                                                                                          | -0.3521763                                                    | 0.00123508  | 0.6662947       | 0.00037841      |
| <i>Gabra1</i>                                                                                                                                           | -0.310818                                                     | 0.04736295  | 0.63382655      | 0.00088259      |
| <i>Kcnh7</i>                                                                                                                                            | -0.6226457                                                    | 0.03486339  | 0.6330891       | 0.00089874      |
| <i>Ptpn4</i>                                                                                                                                            | -0.3417165                                                    | 0.00235884  | 0.61488654      | 0.00138655      |
| <i>Ppm1k</i>                                                                                                                                            | -0.2359459                                                    | 0.01519108  | 0.61390032      | 0.00141845      |
| <i>Il1rapl1</i>                                                                                                                                         | -0.3754498                                                    | 0.04413688  | 0.60033979      | 0.00192494      |
| <i>Kcnh5</i>                                                                                                                                            | -0.9108005                                                    | 0.03642204  | 0.59523422      | 0.00215201      |
| <i>Pik3r3</i>                                                                                                                                           | -0.2398985                                                    | 0.0081861   | 0.59402245      | 0.00220912      |
| <i>Tab3</i>                                                                                                                                             | -0.2474935                                                    | 0.00681953  | 0.59386447      | 0.00221666      |
| <i>Pgr</i>                                                                                                                                              | -0.4488183                                                    | 0.01157335  | 0.58760374      | 0.00253367      |
| <i>Zfyve9</i>                                                                                                                                           | -0.2056544                                                    | 0.00470079  | 0.58703924      | 0.00256405      |
| <i>Fbxl3</i>                                                                                                                                            | -0.125008                                                     | 0.0492433   | 0.58524524      | 0.00266268      |
| <i>Pde7b</i>                                                                                                                                            | -0.7022167                                                    | 0.01988292  | 0.57891453      | 0.00303685      |
| <i>Trim37</i>                                                                                                                                           | -0.2730551                                                    | 0.00808642  | 0.57806273      | 0.00309043      |
| <i>Abcd2</i>                                                                                                                                            | -0.4812836                                                    | 0.01830501  | 0.56309238      | 0.00417141      |
| <i>Cacnb4</i>                                                                                                                                           | -0.404557                                                     | 0.04698135  | 0.55710299      | 0.00468523      |
| <i>Ccng1</i>                                                                                                                                            | -0.3696455                                                    | 0.00076862  | 0.55567729      | 0.00481509      |
| <i>Ptar1</i>                                                                                                                                            | -0.4602855                                                    | 0.00321787  | 0.54848416      | 0.00551729      |
| <i>Plag1</i>                                                                                                                                            | -0.4717523                                                    | 0.01772261  | 0.54474836      | 0.0059146       |
| <i>Nxt2</i>                                                                                                                                             | -0.2335756                                                    | 0.0271947   | 0.54411182      | 0.00598463      |
| <i>Zfp106</i>                                                                                                                                           | -0.1500603                                                    | 0.00016078  | 0.54147036      | 0.00628269      |
| <i>Pvalb</i>                                                                                                                                            | -0.5989511                                                    | 0.02198946  | 0.53723473      | 0.0067865       |
| <i>Spcs3</i>                                                                                                                                            | -0.2220862                                                    | 0.04736295  | 0.53280558      | 0.00734894      |
| <i>Spag9</i>                                                                                                                                            | -0.1668287                                                    | 0.00029442  | 0.52601692      | 0.00828607      |
| <i>Atrn11</i>                                                                                                                                           | -0.3261077                                                    | 0.0286946   | 0.52594548      | 0.00829644      |
| <i>Tmem56</i>                                                                                                                                           | -0.3539449                                                    | 0.01730313  | 0.52466698      | 0.00848378      |
| <i>Tmem14a</i>                                                                                                                                          | -0.3502767                                                    | 0.04223044  | 0.52126277      | 0.0089998       |
| <i>Gprn3</i>                                                                                                                                            | -0.5619832                                                    | 0.02821759  | 0.49492424      | 0.01393944      |
| <i>Cdh12</i>                                                                                                                                            | -0.5120774                                                    | 0.01988292  | 0.48018983      | 0.01755535      |
| <i>Rgs7bp</i>                                                                                                                                           | -0.2796904                                                    | 0.00192408  | 0.47954087      | 0.01773067      |
| <i>Creb1</i>                                                                                                                                            | -0.1782215                                                    | 0.0167314   | 0.47816274      | 0.01810769      |
| <i>Klf6</i>                                                                                                                                             | -0.2859272                                                    | 0.02748043  | 0.46765283      | 0.02120265      |

**Table S6.** The log2fold values of each gene involved in *mus-musculus* anti-aging when comparing each group to 19%P as revealed by *GenAge*, the online aging gene database, Related to Figure 2.

| <b>Anti-longevity</b> | <b>15% protein</b> | <b>10% protein</b> | <b>5% protein</b> | <b>CR</b>  |
|-----------------------|--------------------|--------------------|-------------------|------------|
| <i>Adcy5</i>          | 0.00101141         | 0.05771784         | -0.0523274        | -0.0534537 |
| <i>Cdkn1a</i>         | 0.7377191          | 0.35277723         | 0.54534961        | -0.7218583 |
| <i>Coq7</i>           | -0.0737427         | 0.00790468         | -0.1330624        | 0.04306016 |
| <i>Ghr</i>            | -0.0975083         | -0.0622679         | -0.1283798        | -0.0774089 |
| <i>Gpx4</i>           | -0.0120894         | 0.02557822         | -0.0212931        | 0.03566496 |
| <i>Igflr</i>          | 0.10137465         | -0.0513397         | -0.0435251        | -0.0809981 |
| <i>Insr</i>           | -0.0826957         | -0.0620446         | -0.1249071        | 0.00858514 |
| <i>Irs1</i>           | 0.01163419         | -0.0842415         | -0.0278227        | 0.1763891  |
| <i>Irs2</i>           | 0.415006           | 0.38797032         | 0.33342455        | 0.39567919 |
| <i>Pappa</i>          | 0.12777558         | 0.14983361         | 0.06923623        | 0.32701302 |
| <i>Shc1</i>           | -0.0085756         | 0.05193752         | -0.1203029        | 0.05694044 |
| <i>Surf1</i>          | -0.041281          | 0.0327547          | -0.0322512        | 0.03530401 |
| <i>Terf2</i>          | 0.01977974         | -0.0201558         | -0.0127406        | 0.05504929 |
| <i>Agtr1a</i>         | 0.29542411         | 0.40157403         | -0.0768968        | 0.6068944  |
| <i>Eef1e1</i>         | 0.10322327         | 0.00036954         | 0.10715376        | 0.02357882 |
| <i>Eps8</i>           | 0.22462836         | 0.20697937         | 0.11479969        | 0.07668302 |
| <i>Htt</i>            | 0.0247453          | -0.0075698         | 0.05237501        | 0.00793609 |
| <i>Kcna3</i>          | -0.0507403         | 0.01600972         | 0.02044149        | -0.0960018 |
| <i>Trp53bp1</i>       | 0.08334146         | 0.08299112         | 0.04582947        | 0.04969909 |
| <i>Rps6kb1</i>        | -0.0358813         | -0.1126248         | 0.01474385        | 0.01180968 |
| <i>Prkar2b</i>        | -0.066228          | -0.1862829         | -0.1960429        | -0.229938  |
| <i>Eif5a2</i>         | -0.105278          | -0.1477355         | -0.0895156        | -0.2019709 |
| <i>Mif</i>            | 0.03320796         | 0.04232219         | -0.0038491        | 0.06173697 |
| <i>Dgat1</i>          | 0.02517592         | 0.17927008         | 0.08849546        | 0.21041512 |
| <i>Gsta4</i>          | -0.0276925         | 0.04205657         | -0.0100078        | 0.02963213 |
| <i>Mtor</i>           | 0.07834324         | 0.0802618          | 0.05700023        | 0.13390206 |
| <i>Akt1</i>           | -0.0098096         | 0.03854792         | 0.0135716         | 0.04650128 |
| <i>Ikkbb</i>          | 0.01562326         | 0.02150382         | 0.08282916        | -0.0622174 |
| <i>Serpine1</i>       | 0.56801856         | 0.45845617         | 0.11176432        | 0.38427494 |
| <i>Myc</i>            | 0.35789686         | 0.37327365         | 0.26443569        | 0.34441771 |
| <i>Ctfl</i>           | 0.04690428         | 0.18322558         | -0.0154515        | 0.60451893 |
| <i>Trpv1</i>          | -0.8993551         | 0.33012914         | -0.3504407        | -0.2146092 |
| <i>Adra1b</i>         | -0.1498984         | -0.648872          | -0.5868867        | -0.5445847 |
| <i>Mtbp</i>           | -0.1725916         | 0.00078446         | -0.1709641        | 0.03955118 |
| <i>GMFB</i>           | -0.0162379         | -0.0598283         | 0.04766998        | -0.1754922 |
| <i>Per2</i>           | 0.30984155         | 0.2393255          | 0.22066461        | 0.16328089 |

**Table S7.** The log2fold values of each gene involved in *mus-musculus* pro-aging when comparing each group to 19%P as revealed by *GenAge*, the online aging gene database, Related to Figure 2.

| <b>Pro-longevity</b> | <b>15% protein</b> | <b>10% protein</b> | <b>5% protein</b> | <b>CR</b>  |
|----------------------|--------------------|--------------------|-------------------|------------|
| <i>Arhgap1</i>       | 0.01472539         | 0.02169014         | 0.0283409         | 0.04870202 |
| <i>Arntl</i>         | -0.0235492         | -0.0922206         | -0.0117955        | -0.296538  |
| <i>Atm</i>           | -0.1350654         | -0.1323911         | -0.0631488        | -0.1103872 |
| <i>Atr</i>           | -0.157324          | -0.1734812         | -0.1028854        | -0.1585894 |
| <i>Brca1</i>         | -0.1799138         | -0.4354884         | 0.0697703         | -0.2901321 |
| <i>Bub1b</i>         | -0.5832571         | -0.2441502         | 0.17637462        | -0.1148866 |
| <i>Bub3</i>          | -0.0140228         | -0.0550891         | -0.0429496        | -0.0357142 |
| <i>Casp2</i>         | -0.2311755         | -0.034555          | -0.0794455        | 0.04008864 |
| <i>Cat</i>           | -0.0019598         | -0.044525          | -0.046639         | 0.06908542 |
| <i>Cav1</i>          | -0.0506545         | 0.03932483         | 0.02036309        | -0.1862541 |
| <i>Chek2</i>         | 0.3034059          | 0.14290546         | 0.2064488         | 0.22604372 |
| <i>Efemp1</i>        | -0.0010094         | 0.12383775         | -0.299932         | -0.0501378 |
| <i>Ercc2</i>         | 0.11967058         | 0.21557756         | 0.09748366        | 0.23052638 |
| <i>Ercc4</i>         | 0.01829984         | -0.0393227         | 0.03393852        | 0.04402606 |
| <i>Foxm1</i>         | 0.39617119         | 0.3546454          | 0.41792158        | 0.26177433 |
| <i>Fxn</i>           | 0.30521288         | 0.40300464         | 0.30338086        | 0.21960896 |
| <i>Hells</i>         | -0.0551892         | -0.4533302         | -0.2362269        | -0.2805961 |
| <i>Htr1b</i>         | 0.11440774         | -0.1981081         | -0.2953036        | -0.3121809 |
| <i>Kl</i>            | -0.1645951         | -0.724464          | -1.2783803        | -0.1869482 |
| <i>Mcm2</i>          | -0.1288324         | -0.0379488         | -0.0364486        | 0.17960689 |
| <i>Mgat5</i>         | 0.05205893         | -0.0962008         | -0.0287829        | -0.0610701 |
| <i>Msh2</i>          | -0.184829          | -0.1546783         | -0.1923001        | -0.2006773 |
| <i>Msra</i>          | -0.1441285         | 0.00817381         | -0.0222092        | 0.07818727 |
| <i>Neil1</i>         | -0.0442839         | 0.06125585         | 0.05353876        | -0.0482191 |
| <i>Nos3</i>          | 0.09270389         | 0.16102161         | 0.07008146        | -0.0127572 |
| <i>Pawr</i>          | 0.48891806         | 0.30262196         | 0.12309857        | 0.30313031 |
| <i>Plau</i>          | 0.12046579         | -0.1699962         | -0.2446204        | -0.146323  |
| <i>Polg</i>          | -0.0507667         | -0.0414472         | -0.0575781        | 0.00198663 |
| <i>Ppm1d</i>         | -0.0921606         | -0.066257          | -0.1730867        | 0.06070633 |
| <i>Prdx1</i>         | -0.0632609         | -0.1009401         | -0.0722758        | -0.0465243 |
| <i>Rae1</i>          | -0.0646415         | 0.05941629         | 0.04225784        | 0.15557218 |
| <i>Sirt6</i>         | 0.0747384          | 0.10655685         | 0.08336311        | 0.1374625  |
| <i>Slc25a4</i>       | -0.0493511         | -0.0492517         | -0.0291346        | -0.0188985 |
| <i>Stub1</i>         | 0.04627869         | 0.05517608         | 0.05667367        | 0.08146132 |
| <i>Tert</i>          | -0.220479          | 0.09297109         | 0.19679318        | -0.1721455 |
| <i>Top3b</i>         | -0.0132511         | -0.0420395         | 0.00995746        | 0.04664054 |
| <i>Trp53</i>         | -0.1050617         | 0.02056071         | -0.0228488        | 0.14547218 |

|                 |            |            |            |            |
|-----------------|------------|------------|------------|------------|
| <i>Trp63</i>    | -0.0237196 | -0.0220774 | -0.159791  | -0.4238329 |
| <i>Txn1</i>     | -0.1197964 | 0.0342771  | 0.0503297  | -0.0382848 |
| <i>Ucp2</i>     | 0.22380362 | 0.16068458 | -0.1717167 | 0.24193137 |
| <i>Xpa</i>      | -0.2123533 | -0.1424581 | 0.00965685 | -0.0536911 |
| <i>Xrcc5</i>    | 0.04207824 | -0.1571704 | -0.1187839 | -0.0298264 |
| <i>Xrcc6</i>    | -0.1114411 | -0.1234526 | -0.1345597 | -0.0366144 |
| <i>Zmpste24</i> | 0.01297913 | -0.0204502 | -0.0648816 | -0.1187497 |
| <i>ApoE</i>     | 0.1288558  | 0.23588882 | 0.06155151 | 0.23889281 |
| <i>Cisd2</i>    | -0.0575493 | -0.1531616 | -0.068797  | -0.1075128 |
| <i>Clock</i>    | -0.0254955 | -0.1162018 | -0.0642864 | -0.2036687 |
| <i>Dmd</i>      | -0.1094382 | -0.1136045 | -0.0881478 | -0.1333848 |
| <i>Fn1</i>      | 0.07591546 | 0.34096519 | 0.0811186  | 0.16981677 |
| <i>Hnrnpd</i>   | 0.00353037 | -0.0079354 | -0.019962  | 0.03498714 |
| <i>Jund</i>     | 0.25449322 | 0.39133029 | 0.21424433 | 0.41596706 |
| <i>Pparg</i>    | -0.2879742 | -0.6457382 | -0.3525091 | -0.6113942 |
| <i>Sirt7</i>    | 0.0655924  | 0.20156253 | 0.09263095 | 0.11525205 |
| <i>Socs2</i>    | 0.00789526 | 0.11893311 | 0.14228172 | 0.01562922 |
| <i>Sod2</i>     | 0.00589075 | -0.0768286 | -0.0098854 | -0.1439157 |
| <i>Topors</i>   | -0.0865081 | -0.15807   | -0.1448736 | -0.0843207 |
| <i>Tpp2</i>     | -0.0242168 | -0.0684694 | 0.02095572 | -0.0437661 |
| <i>Parp1</i>    | 0.02931385 | 0.08868345 | 0.15697886 | 0.0770911  |
| <i>Sirt1</i>    | 0.02226846 | -0.1053712 | -0.0144651 | 0.06436107 |
| <i>Pten</i>     | 0.00963482 | -0.1002418 | -0.0707925 | -0.0758108 |
| <i>Cdc14b</i>   | -0.0121771 | -0.227941  | -0.2742356 | -0.2442611 |
| <i>Mt1</i>      | 0.04160547 | 0.15355501 | 0.05442407 | 0.13364061 |
| <i>Trp73</i>    | 0.28424114 | -0.1068311 | -0.4463664 | 0.27153949 |
| <i>Htra2</i>    | -0.0664208 | -0.0143931 | -0.031976  | 0.02341684 |
| <i>Gsk3a</i>    | -0.0090046 | -0.037634  | 0.0007846  | 0.02773572 |
| <i>NUDT1</i>    | 0.12563543 | 0.1936328  | 0.00911153 | -0.1758967 |
| <i>Sqstm1</i>   | 0.00416845 | 0.03353688 | 0.02217693 | 0.11893822 |
| <i>Cdk7</i>     | -0.0619699 | -0.1046035 | -0.0776116 | -0.0936238 |
| <i>Grn</i>      | -0.0116829 | 0.11031105 | 0.03003236 | 0.11047344 |
| <i>Ncor2</i>    | 0.21859183 | 0.17958035 | 0.14104844 | 0.16339809 |
| <i>Ercc1</i>    | 0.01312657 | -0.0136704 | 0.06253632 | -0.0139188 |
| <i>Rictor</i>   | -0.0395646 | -0.0869194 | -0.0081099 | -0.1273791 |
| <i>Atg5</i>     | -0.062396  | -0.0215193 | -0.0368581 | -0.0897468 |
| <i>Adra1a</i>   | 0.02744343 | -0.0380839 | 0.02020799 | -0.1409094 |
| <i>Nfkb1</i>    | 0.07013187 | 0.07207794 | 0.09139244 | 0.06806671 |
| <i>Rbm38</i>    | 0.20968059 | 0.23496542 | 0.2971683  | 0.64836596 |
| <i>Coll1a1</i>  | -0.1680529 | 0.13717079 | -0.6490787 | 0.08997952 |
| <i>Siglece</i>  | -0.4827507 | -0.4301152 | -0.2071509 | -0.3080146 |
| <i>SOD3</i>     | 0.10686177 | 0.18017767 | -0.0393098 | 0.07608005 |

**Table S8.** Genes associated with CR and the corresponding log2fold values when comparing each group to 19%P, Related to Figure 3.

| <b>Overexpressed with CR</b> | <b>15% protein</b> | <b>10% protein</b> | <b>5% protein</b> | <b>CR</b>  |
|------------------------------|--------------------|--------------------|-------------------|------------|
| <i>Acot12</i>                | -0.4510922         | -0.0282806         | 0.09478237        | 0.15608275 |
| <i>Inmt</i>                  | -0.4455502         | -0.3770715         | -0.287243         | 0.71539539 |
| <i>Mat1a</i>                 | -0.3018161         | -1.3844592         | -0.5723038        | -0.2298032 |
| <i>Tmem218</i>               | -0.2754751         | -0.3216527         | -0.3111763        | -0.3017594 |
| <i>Klf10</i>                 | -0.2689117         | -0.235222          | -0.0516133        | 0.01296802 |
| <i>Epb4.1</i>                | -0.2574814         | -0.3401682         | -0.2811228        | -0.2815561 |
| <b><i>Dbp</i></b>            | -0.2161203         | -0.1110509         | -0.3084841        | 0.65835636 |
| <i>Gpr146</i>                | -0.2093064         | -0.1425984         | -0.1245682        | -0.0451288 |
| <i>Aldh1a1</i>               | -0.2072118         | -0.3537867         | -0.1784337        | -0.2910412 |
| <i>St3gal5</i>               | -0.2047768         | -0.2017289         | -0.0694903        | -0.1745451 |
| <i>Sun2</i>                  | -0.1815075         | -0.1281606         | -0.1103428        | -0.0930545 |
| <i>Rhobtb1</i>               | -0.1795693         | -0.0471919         | -0.0988085        | -0.0753131 |
| <i>Mgp</i>                   | -0.1453807         | 0.14646765         | -0.4430167        | 0.11290186 |
| <i>Ehhadh</i>                | -0.141166          | -0.2217855         | -0.0391253        | 0.2352127  |
| <i>Bnip3</i>                 | -0.1386123         | -0.1119989         | 0.03939532        | -0.0804203 |
| <i>Igfbp2</i>                | -0.1231492         | -0.3704185         | -1.0580601        | -0.1243689 |
| <i>Usp2</i>                  | -0.1208957         | -0.1807186         | -0.2043066        | 0.12193633 |
| <i>Cyp2j6</i>                | -0.1093863         | -0.1228871         | -0.1889964        | -0.0842898 |
| <i>Dusp1</i>                 | -0.0902481         | -0.1788821         | -0.3117596        | -0.0070359 |
| <i>Ntf3</i>                  | -0.0834746         | 0.06064372         | 0.05948092        | 0.32655401 |
| <i>Hacl1</i>                 | -0.083386          | -0.2291783         | -0.0286324        | 0.03363977 |
| <i>Ppara</i>                 | -0.0689816         | 0.05138249         | 0.09588951        | 0.10866857 |
| <i>Slc37a4</i>               | -0.0641777         | 0.04351523         | 0.0249397         | 0.04270592 |
| <i>Adcy1</i>                 | -0.0570892         | -0.1947714         | -0.029705         | -0.1771128 |
| <i>Decr2</i>                 | -0.0509821         | 0.02704746         | -0.0543016        | -0.0726938 |
| <i>Decr1</i>                 | -0.0508268         | -0.1072088         | -0.1334743        | -0.1762638 |
| <i>Tob1</i>                  | -0.044159          | -0.1874523         | -0.2183286        | 0.07368644 |
| <b><i>Cbr1</i></b>           | -0.0408525         | 0.04875346         | 0.02661066        | 0.0731318  |
| <i>Per1</i>                  | -0.0224094         | -0.0334725         | -0.0285945        | 0.22766577 |
| <i>Wee1</i>                  | -0.0216056         | -0.0744612         | -0.1935011        | -0.2043732 |
| <i>Acot4</i>                 | -0.009239          | 0.22999321         | 0.13312325        | -0.0117283 |
| <i>Cpt1a</i>                 | -0.0087565         | -0.0543521         | -0.2633878        | 0.1174669  |
| <i>Lpin1</i>                 | -0.0079843         | 0.05961562         | -0.0030391        | 0.04540081 |
| <i>Pla2g12a</i>              | 0.00973676         | -0.0053818         | -0.022337         | 0.05238588 |
| <i>Ablim3</i>                | 0.02178646         | -0.0781005         | -0.0303703        | 0.02870046 |
| <i>Rhbdd2</i>                | 0.02956889         | 0.04586255         | 0.00088878        | 0.03823837 |
| <i>Klf9</i>                  | 0.04064265         | -0.0255918         | -0.0227936        | -0.1127542 |
| <i>Klf9</i>                  | 0.04064265         | -0.0255918         | -0.0227936        | -0.1127542 |

|                               |                    |                    |                   |            |
|-------------------------------|--------------------|--------------------|-------------------|------------|
| <i>Mt1</i>                    | 0.04160547         | 0.15355501         | 0.05442407        | 0.13364061 |
| <i>Ifrd1</i>                  | 0.04205248         | 0.01948604         | 0.03144177        | -0.0418738 |
| <i>Crym</i>                   | 0.04682847         | 0.37502488         | 0.35962182        | 0.31178074 |
| <i>Slc25a25</i>               | 0.04813346         | 0.03294377         | -0.0181616        | -0.0818371 |
| <i>Zfp354a</i>                | 0.0647907          | -0.1386225         | 0.24452415        | 0.00846424 |
| <i>Enpep</i>                  | 0.07847471         | -0.1889923         | -0.1513999        | -0.4677518 |
| <i>Nfkbia</i>                 | 0.09375226         | 0.43106597         | 0.15339755        | -0.0178166 |
| <i>Por</i>                    | 0.10008187         | 0.06311304         | -0.0043761        | 0.21481561 |
| <i>Sall1</i>                  | 0.11153679         | 0.025667           | -0.0045194        | 0.14597973 |
| <i>Slc25a42</i>               | 0.11350385         | 0.11584435         | 0.19290471        | 0.02084894 |
| <i>Fam195a</i>                | 0.11976624         | 0.1781308          | 0.21054772        | 0.0635081  |
| <i>Pim3</i>                   | 0.13951806         | 0.2070903          | 0.09276525        | 0.16127446 |
| <i>Mt2</i>                    | 0.14890754         | 0.2766307          | 0.17300344        | 0.1476554  |
| <i>Cobll1</i>                 | 0.14983442         | 0.00249694         | 0.00184324        | 0.18703689 |
| <i>Plcx3</i>                  | 0.15690057         | 0.10954026         | 0.121864          | -0.090086  |
| <i>Fam107a</i>                | 0.17038021         | 0.15551367         | 0.01805516        | -0.2562289 |
| <i>Ctgf</i>                   | 0.17194899         | 0.24490704         | 0.17929895        | -0.016758  |
| <i>Nat8</i>                   | 0.19793868         | 0.0250599          | -0.1664148        | -0.0016687 |
| <i>Cry1</i>                   | 0.20938696         | 0.02570787         | 0.01403533        | 0.06276243 |
| <i>Herpud1</i>                | 0.26219829         | 0.04185022         | 0.07672109        | 0.05425907 |
| <i>Trp53i13</i>               | 0.26322852         | 0.37215079         | 0.1450828         | 0.39032931 |
| <i>Smoc1</i>                  | 0.29468753         | 0.34363698         | 0.02806185        | 0.27279036 |
| <i>Per2</i>                   | 0.30984155         | 0.2393255          | 0.22066461        | 0.16328089 |
| <i>Fkbp5</i>                  | 0.33165152         | 0.31806022         | 0.30150165        | 0.09886719 |
| <i>Klf15</i>                  | 0.33594585         | 0.34486323         | 0.17454914        | 0.05100368 |
| <i>Tsc22d3</i>                | 0.35975863         | 0.39717674         | 0.12507946        | -0.0896571 |
| <i>Arrdc2</i>                 | 0.38448986         | 0.39440052         | 0.29753779        | -0.177259  |
| <i>Fzd1</i>                   | 0.39085794         | 0.44413288         | 0.13652337        | 0.55863088 |
| <i>Irs2</i>                   | 0.415006           | 0.38797032         | 0.33342455        | 0.39567919 |
| <i>Sult1a1</i>                | 0.42825862         | 0.46386113         | 0.07635109        | -0.0791534 |
| <i>Rgs16</i>                  | 0.43144714         | -0.3308686         | -0.300976         | -0.1803528 |
| <i>Angptl4</i>                | 0.49113968         | 0.73679064         | 0.27201196        | 0.15678084 |
| <i>Cd163</i>                  | 0.52539695         | 0.51771548         | -0.4282355        | -0.1997675 |
| <i>Map3k6</i>                 | 0.56449422         | 0.58182212         | 0.39503114        | 0.16610049 |
| <i>Gys2</i>                   | 0.70771346         | -0.2968843         | 0.63632324        | 1.52193882 |
| <i>Zbtb16</i>                 | 0.81555612         | 0.6481624          | 0.46377654        | 0.20752908 |
| <i>Plin5</i>                  | 1.11831391         | 0.29213504         | 0.18592859        | 0.81500252 |
| <i>Plin4</i>                  | 2.21956688         | 1.38281782         | 1.0719565         | 0.69817751 |
| <b>Underexpressed with CR</b> | <b>15% protein</b> | <b>10% protein</b> | <b>5% protein</b> | <b>CR</b>  |
| <i>Casc5</i>                  | -1.1915579         | -0.9115165         | -0.3733886        | -0.4002452 |
| <i>Ifi2712a</i>               | -1.0223006         | -0.3363049         | -1.1486906        | 0.15412521 |
| <i>Phf19</i>                  | -0.8146298         | -0.2609268         | -0.2056072        | -0.4251833 |

|                      |            |            |            |            |
|----------------------|------------|------------|------------|------------|
| <i>Tnfrsf10</i>      | -0.6984303 | -0.4869579 | -0.0826616 | -0.2735283 |
| <i>Ifih1</i>         | -0.5987212 | -0.4574485 | -0.6186532 | -0.4272112 |
| <i>Tmem132d</i>      | -0.3745109 | -0.4973567 | -0.4804528 | -0.5382282 |
| <i>Alas2</i>         | -0.3558136 | -0.257527  | -0.0886628 | 0.54501254 |
| <i>Insig1</i>        | -0.342859  | -0.3188008 | -0.2644325 | -0.0074479 |
| <i>Gck</i>           | -0.2855682 | -0.1010476 | -0.1877749 | 0.53371548 |
| <i>Col15a1</i>       | -0.2471893 | -0.2388577 | -0.2817814 | -0.0562077 |
| <i>C4bp</i>          | -0.1898903 | -0.9261569 | 0.28982861 | 0.61588131 |
| <i>Irf7</i>          | -0.1737809 | -0.0369168 | -0.3389087 | -0.0266234 |
| <i>Irgm1</i>         | -0.1620699 | -0.2569813 | -0.0610272 | -0.1470485 |
| <i>Scrt1</i>         | -0.1618382 | -0.2410631 | -0.2066196 | -0.1956099 |
| <i>Extl1</i>         | -0.1421953 | -0.1540141 | -0.056344  | -0.0396413 |
| <i>Sc5d</i>          | -0.1219082 | -0.0894164 | -0.057975  | -0.1168206 |
| <i>Cdc42ep2</i>      | -0.1177925 | -0.2260356 | -0.0870679 | 0.13019473 |
| <i>G6pdx</i>         | -0.1095388 | -0.0764554 | -0.1118923 | -0.0250055 |
| <i>Ghr</i>           | -0.0975083 | -0.0622679 | -0.1283798 | -0.0774089 |
| <i>Slc6a6</i>        | -0.0931028 | -0.0806533 | -0.0540442 | 0.09558094 |
| <i>Zfp64</i>         | -0.0785603 | 0.00598083 | 0.0294814  | 0.11536721 |
| <i>Ly6e</i>          | -0.0646478 | -0.0214757 | 0.0685652  | -0.0744331 |
| <i>Nr1d1</i>         | -0.0329025 | -0.106986  | -0.2160847 | 0.45646414 |
| <i>Srebf1</i>        | -0.0257264 | 0.12923937 | -0.0652295 | 0.3449339  |
| <i>Fabp5</i>         | -0.0254908 | 0.00881646 | -0.01323   | 0.06591191 |
| <i>Arntl</i>         | -0.0235492 | -0.0922206 | -0.0117955 | -0.296538  |
| <i>1110051M20Rik</i> | -0.0068467 | 0.05837647 | 0.05276045 | 0.02034748 |
| <i>Dhcr7</i>         | -0.0062799 | -0.0128339 | 0.0843046  | -0.0362128 |
| <i>Acly</i>          | -0.002286  | -0.016171  | -0.0683946 | -0.0665175 |
| <i>Psmb8</i>         | 0.00410806 | -0.0244623 | 0.08102317 | -0.0097197 |
| <i>Scly</i>          | 0.01006253 | -0.0055203 | -0.106322  | -0.0494183 |
| <i>R3hdm2</i>        | 0.02121147 | -0.1549211 | -0.0949987 | -0.2178529 |
| <i>Gtf2ird1</i>      | 0.02962381 | -0.0835866 | -0.0947068 | 0.08469086 |
| <i>Litaf</i>         | 0.05273628 | -0.0769627 | -0.0290641 | 0.12214575 |
| <i>Dpp9</i>          | 0.08204702 | 0.06567618 | 0.07891555 | -0.0107709 |
| <i>Stac3</i>         | 0.08858554 | -0.0270473 | 0.11122527 | 0.13789108 |
| <i>Actg1</i>         | 0.10932333 | 0.17951554 | 0.08617046 | 0.34357994 |
| <i>Pdia3</i>         | 0.13168417 | 0.03701201 | 0.01424799 | -0.1994026 |
| <i>Ptprj</i>         | 0.13291944 | -0.0315285 | 0.06656098 | -0.0084613 |
| <i>G0s2</i>          | 0.14072088 | 0.17985659 | 0.30948104 | 0.13054967 |
| <i>Hipk2</i>         | 0.14756454 | 0.00044062 | -0.0055519 | -0.1040742 |
| <i>Phlda1</i>        | 0.16046551 | -0.019217  | -0.0082457 | 0.10433809 |
| <i>Serpinh1</i>      | 0.16663189 | 0.10050277 | -0.1119897 | -0.0313443 |
| <i>Cldn1</i>         | 0.18630663 | -0.5353095 | -0.8608371 | -0.0642067 |
| <i>Mmp15</i>         | 0.19812773 | 0.12577564 | -0.0740732 | -0.0370251 |



|                 |            |            |            |            |
|-----------------|------------|------------|------------|------------|
| <i>Tfll12</i>   | 0.22451206 | 0.18176083 | 0.1011936  | 0.15092252 |
| <i>Dnase112</i> | 0.2358725  | 0.24456262 | 0.25622468 | -0.0177012 |
| <i>Hspa5</i>    | 0.43436974 | 0.20979303 | 0.15726423 | -0.2931173 |

**Table S9.** The top differentially genes associated with cytokine response as determined by and the corresponding log2fold values when comparing each group to 19%P, Related to Figure 1.

| <b>GO:0034097:<br/>Response to<br/>cytokine</b> | <b>15%<br/>protein</b> | <b>10%<br/>protein</b> | <b>5%<br/>protein</b> | <b>CR</b>  |
|-------------------------------------------------|------------------------|------------------------|-----------------------|------------|
| <i>Prlr</i>                                     | -0.3124379             | -1.4854024             | -2.1264179            | -1.0987817 |
| <i>Il2ra</i>                                    | -0.5127679             | 0.09017402             | -0.2243204            | 0.76074868 |
| <i>Lepr</i>                                     | -0.380699              | -0.6124417             | -0.9759275            | -0.380013  |
| <i>Il20ra</i>                                   | -0.5622562             | -0.3511454             | -0.8281828            | -0.2487755 |
| <b><i>Socs1</i></b>                             | 0.08811141             | -0.3144046             | -0.4770619            | -0.4164325 |
| <i>Tnfrsf11a</i>                                | 0.0362551              | -0.4523289             | -0.266672             | -0.2844594 |
| <i>Sigirr</i>                                   | -0.1517293             | -0.1743266             | -0.1923981            | -0.5195826 |
| <i>Grem2</i>                                    | 0.03539414             | 0.14672447             | 0.08904538            | -0.2392744 |
| <i>Mkks</i>                                     | -0.0148601             | -0.1399518             | 0.06324986            | -0.3196247 |
| <i>Stat6</i>                                    | -0.0483035             | -0.3804103             | -0.3950694            | -0.3218779 |
| <i>Parp9</i>                                    | -0.1261586             | 0.12127626             | -0.2192537            | -0.2226355 |
| <i>Irf7</i>                                     | -0.1737809             | -0.0369168             | -0.3389087            | -0.0266234 |
| <i>Irf3</i>                                     | 0.21830031             | 0.21247326             | 0.06261317            | -0.0830612 |
| <i>Adipor2</i>                                  | 0.34075238             | 0.20656695             | 0.10639012            | 0.00965924 |
| <i>Il10rb</i>                                   | -0.1297183             | -0.063788              | -0.2116667            | 0.09160023 |
| <i>Ripk2</i>                                    | -0.1681861             | -0.2638534             | -0.2004819            | 0.00583    |
| <i>Ptpn2</i>                                    | 0.19040233             | 0.0610843              | 0.06838353            | -0.0904268 |
| <i>Tnip2</i>                                    | -0.0517848             | 0.13181735             | 0.11696048            | 0.22270761 |
| <i>Jak2</i>                                     | 0.03915672             | -0.0240166             | 0.01805368            | -0.1995238 |
| <i>Tnfrsf1a</i>                                 | 0.05299786             | 0.20940839             | -0.017096             | 0.17760221 |
| <i>Trp53</i>                                    | -0.1050617             | 0.02056071             | -0.0228488            | 0.14547218 |
| <i>Cav1</i>                                     | -0.0506545             | 0.03932483             | 0.02036309            | -0.1862541 |
| <i>Parp14</i>                                   | -0.0112184             | -0.0505822             | -0.0618727            | -0.2309541 |
| <i>Slc27a1</i>                                  | 0.16101155             | 0.29478276             | 0.09296984            | 0.25022265 |
| <i>Ptk2b</i>                                    | -0.0263274             | 0.0623601              | 0.09468539            | 0.18805537 |
| <i>Nol3</i>                                     | -0.0294703             | 0.12527003             | 0.03103341            | 0.15922547 |
| <i>Pias4</i>                                    | 0.12979144             | 0.06255174             | 0.08790193            | 0.25625004 |
| <i>Kit</i>                                      | 0.03252986             | 0.18885826             | 0.17344145            | 0.22149999 |
| <i>Acs11</i>                                    | -0.1222602             | -0.1462795             | -0.1658713            | 0.0163453  |
| <i>Irgm1</i>                                    | -0.1620699             | -0.2569813             | -0.0610272            | -0.1470485 |
| <i>Peli3</i>                                    | -0.0567931             | 0.11092357             | -0.0281605            | 0.0637812  |
| <i>Sirt1</i>                                    | 0.02226846             | -0.1053712             | -0.0144651            | 0.06436107 |
| <i>Stat2</i>                                    | -0.042218              | -0.0124125             | 0.07106699            | -0.1024895 |
| <i>Gab1</i>                                     | 0.12752407             | 0.10163881             | -0.0151442            | 0.14445643 |
| <i>Fer</i>                                      | -0.0972999             | -0.1281971             | -0.0033358            | -0.1728492 |
| <i>Il1r1</i>                                    | -0.0206728             | 0.03637892             | 0.10896669            | -0.0483269 |
| <i>Tjp2</i>                                     | 0.12938579             | 0.00751226             | -0.028789             | 0.06469961 |

|                |            |            |            |            |
|----------------|------------|------------|------------|------------|
| <i>Flt3</i>    | -0.0569778 | -0.1759885 | -0.0786975 | -0.1942215 |
| <i>Cx3cr1</i>  | 0.00476811 | 0.12471401 | 0.15210297 | 0.04912149 |
| <i>Jagn1</i>   | 0.0095568  | 0.04512287 | -0.0216618 | -0.1091516 |
| <i>Bbs4</i>    | -0.0249573 | -0.0140786 | 0.00858946 | -0.1366441 |
| <i>Traf3</i>   | 0.1727386  | 0.22543352 | 0.24589551 | 0.10329988 |
| <i>Mt3</i>     | 0.05115107 | 0.10850541 | 0.12232796 | -0.0133889 |
| <i>Stat1</i>   | 0.00326868 | 0.12226689 | 0.00690766 | -0.0089325 |
| <i>Ikkkb</i>   | 0.01562326 | 0.02150382 | 0.08282916 | -0.0622174 |
| <i>Cib1</i>    | 0.07730703 | 0.20710862 | 0.12418305 | 0.1798827  |
| <i>Otulin</i>  | -0.0037782 | -0.0922348 | -0.0454188 | 0.03129271 |
| <i>Trim32</i>  | 0.00896249 | 0.01671982 | 0.05668749 | 0.11179068 |
| <i>Traf6</i>   | 0.061785   | -0.0056239 | 0.05390657 | 0.10552657 |
| <i>Irf1</i>    | -0.030716  | 0.07553137 | 0.03442714 | 0.05023534 |
| <i>Adar</i>    | 0.04747298 | 0.03806305 | -0.0098541 | -0.0495348 |
| <i>Fkbp1a</i>  | -0.003495  | 0.03866164 | 0.10328484 | 0.06589078 |
| <i>Crebrf</i>  | -0.0458969 | -0.1190454 | -0.1163381 | -0.1505748 |
| <i>Csf1r</i>   | 0.18230967 | 0.26893674 | 0.22037066 | 0.27288127 |
| <i>Stat3</i>   | 0.04760643 | 0.13692599 | 0.04511536 | 0.06878485 |
| <i>Bbs2</i>    | -0.038754  | -0.0809681 | 0.02165674 | -0.0313752 |
| <i>Adipor1</i> | -0.009471  | -0.0388892 | -0.0997059 | -0.0173026 |
| <i>Cx3cl1</i>  | -0.0159395 | -0.1087117 | -0.0386722 | -0.0736198 |
| <i>Ifnar1</i>  | -0.0897248 | -0.1162311 | -0.0788426 | -0.0319161 |
| <i>Rabgef1</i> | -0.016632  | -0.067883  | -0.0263551 | -0.0846645 |
| <i>Zcchc11</i> | -0.1418487 | -0.1923305 | -0.1438413 | -0.1178958 |
| <i>Sharpin</i> | 0.05408174 | 0.10035881 | 0.12055046 | 0.11199024 |
| <i>Il1rap</i>  | 0.04642549 | 0.04047231 | 0.10001194 | 0.04719802 |
| <i>Ctr9</i>    | 0.00306432 | 0.01857674 | 0.0185325  | -0.0401354 |
| <i>Med1</i>    | 0.03173762 | -0.0023999 | 0.0292154  | -0.0215872 |

**Table S10.** The top differentiated genes associated with dendrite morphogenesis and the corresponding log2fold values when comparing each group to 19% protein, Related to Figure 4.

| <b>GO:0048813:<br/>Dendrite<br/>morphogenesis</b> | <b>15%<br/>protein</b> | <b>10%<br/>protein</b> | <b>5%<br/>protein</b> | <b>CR</b>  |
|---------------------------------------------------|------------------------|------------------------|-----------------------|------------|
| <i>Cacna1f</i>                                    | -0.0183999             | -0.3600848             | -0.5399677            | 0.37805278 |
| <i>Sema3a</i>                                     | -0.1114775             | -0.9538858             | -0.5631468            | -0.8613153 |
| <i>Xlr3b</i>                                      | 0.37932445             | -0.0122672             | 0.20431643            | -0.304775  |
| <i>Nfatc4</i>                                     | -0.3097113             | -0.0687018             | -0.3471485            | 0.14849524 |
| <i>Ephb3</i>                                      | -0.3315877             | -0.3066718             | -0.0838266            | 0.14847308 |
| <i>Atp7a</i>                                      | 0.06392776             | -0.1854235             | -0.2475899            | -0.3367102 |
| <i>Cux2</i>                                       | -0.1512067             | -0.5112572             | -0.4520998            | -0.4175882 |
| <i>Chrna7</i>                                     | -0.1929339             | 0.02888425             | 0.1099817             | 0.03311738 |
| <i>Cux1</i>                                       | -0.1900122             | -0.4923989             | -0.3885139            | -0.3632077 |
| <i>Ephb1</i>                                      | 0.04139052             | -0.1638925             | 0.01568811            | 0.08827617 |
| <i>Zfp365</i>                                     | -0.0917968             | -0.176813              | -0.0257962            | -0.270881  |
| <i>Dact1</i>                                      | 0.00614278             | 0.0783615              | -0.0075147            | 0.21958902 |
| <i>Cdk13</i>                                      | -0.1659417             | -0.1299049             | -0.0340576            | 0.06355596 |
| <i>Caprin2</i>                                    | -0.1937324             | 0.00236138             | -0.0325774            | -0.0271619 |
| <i>Prex2</i>                                      | 0.08877366             | 0.04804348             | 0.03671918            | -0.1112024 |
| <i>Epha4</i>                                      | -0.1314543             | -0.0892548             | 0.05932841            | 0.00579808 |
| <i>Nlgn3</i>                                      | 0.13263807             | 0.06230024             | 0.0891848             | 0.24459838 |
| <i>Ptprd</i>                                      | -0.037442              | -0.1844852             | -0.0924727            | -0.2093489 |
| <i>Rbfox2</i>                                     | 0.06520249             | 0.04149948             | 0.03738559            | -0.1095126 |
| <i>Kalrn</i>                                      | -0.1863182             | -0.2214488             | -0.0915808            | -0.0617582 |
| <i>Il1rap1l</i>                                   | -0.2054591             | -0.3204012             | -0.2665911            | -0.3754498 |
| <i>Slc11a2</i>                                    | -0.0974959             | 0.00430504             | 0.00288069            | 0.07924403 |
| <i>Slitrk5</i>                                    | -0.0916813             | -0.0835903             | -0.0174982            | 0.06277435 |
| <i>Ankrd27</i>                                    | -0.0923923             | -0.0315642             | 0.07105617            | 0.02286226 |
| <i>Elavl4</i>                                     | -0.0840633             | -0.2331131             | -0.1408282            | -0.2119659 |
| <i>Ephb2</i>                                      | 0.15298138             | 0.13131575             | 0.1707556             | 0.28418091 |
| <i>Arhgap44</i>                                   | -0.0158529             | -0.0929735             | -0.007467             | 0.07149749 |
| <i>Caprin1</i>                                    | 0.03663942             | 0.0020223              | 0.01197248            | -0.1106857 |
| <i>Dock10</i>                                     | 0.26257051             | 0.12765267             | 0.14990567            | 0.13176725 |
| <i>Ppp3ca</i>                                     | -0.1477279             | -0.1695103             | -0.0473339            | -0.0518907 |
| <i>Ss18l1</i>                                     | -0.032182              | -0.0450651             | 0.02646264            | 0.0929691  |
| <i>Vldlr</i>                                      | -0.0603936             | -0.0627664             | -0.0572817            | 0.06552959 |
| <i>Pak3</i>                                       | 0.08804301             | 0.04058181             | 0.0644234             | -0.0540939 |
| <i>Fmn1</i>                                       | -0.2406328             | -0.3392874             | -0.1949128            | -0.2751251 |
| <i>Nlgn1</i>                                      | -0.0935203             | -0.0840151             | 0.03405325            | -0.0277452 |
| <i>Rab21</i>                                      | 0.0510943              | -0.0577027             | 0.00156715            | -0.0706992 |
| <i>Reln</i>                                       | 0.20969432             | 0.27236936             | 0.14353411            | 0.18055388 |

|                  |            |            |            |            |
|------------------|------------|------------|------------|------------|
| <i>Lrp8</i>      | 0.06803703 | 0.10847874 | 0.10751869 | -0.005584  |
| <i>Camk2a</i>    | 0.01643545 | 0.06209554 | 0.1198379  | 0.13090484 |
| <i>Mapk8</i>     | -0.065824  | -0.1015729 | -0.0046997 | -0.1267613 |
| <i>Itgb1</i>     | 0.00413143 | -0.0857656 | -0.1152058 | -0.0955679 |
| <i>Dscam</i>     | -0.0637295 | -0.0532056 | -0.0829103 | 0.03477883 |
| <i>Pten</i>      | 0.00963482 | -0.1002418 | -0.0707925 | -0.0758108 |
| <i>Dtnbp1</i>    | -0.0845296 | -0.0844208 | 0.00741362 | -0.0278588 |
| <i>Picalm</i>    | 0.0466801  | -0.0161881 | 0.03264976 | -0.0508746 |
| <i>Mapk8ip2</i>  | 0.04528685 | 0.09765425 | 0.06541195 | 0.14744807 |
| <i>Fyn</i>       | 0.0098059  | 0.08234397 | 0.10107542 | 0.08454398 |
| <i>Cdk5r1</i>    | -0.0209863 | -0.0693114 | -0.0540815 | 0.02016562 |
| <i>Hprt</i>      | -0.1327103 | -0.150682  | -0.0644663 | -0.1115482 |
| <i>Kidins220</i> | -0.0144046 | -0.0188056 | -0.0079433 | -0.0871573 |
| <i>Pafah1b1</i>  | -0.0839754 | -0.1043807 | -0.0177611 | -0.0683855 |
| <i>Hdac6</i>     | 0.05399071 | 0.11111336 | 0.08960867 | 0.13716647 |
| <i>Abl2</i>      | 0.0728928  | 0.07181999 | 0.08803355 | 0.01756956 |
| <i>Dvl1</i>      | 0.08825457 | 0.08302734 | 0.08207024 | 0.0257026  |
| <i>Cdk5</i>      | -0.032159  | 0.02545157 | 0.02843784 | -0.0105184 |
| <i>Rere</i>      | 0.15253974 | 0.171391   | 0.11536209 | 0.11597048 |
| <i>Ctnna2</i>    | -0.0800337 | -0.121171  | -0.0583412 | -0.0964205 |
| <i>Wasl</i>      | 0.06028392 | 0.00485558 | 0.04359949 | 0.04627474 |
| <i>Rapgef2</i>   | 0.08429412 | 0.10281787 | 0.09172912 | 0.13554566 |
| <i>Cacna1a</i>   | -0.0363766 | -0.0801176 | -0.0436606 | -0.0391737 |
| <i>Shank3</i>    | 0.11053102 | 0.14201556 | 0.1398349  | 0.1051724  |
| <i>Cdc42</i>     | -0.0917285 | -0.0933177 | -0.0686672 | -0.0744869 |
| <i>Klf7</i>      | -0.2077166 | -0.2206282 | -0.223446  | -0.2217289 |
